# Supplementary material for: Colorimetric sensing of Cu(ii): Cu(ii) induced deprotonation of an amide responsible for color changes
Source: Royal Society of Chemistry journal article supplement (doi:10.1039/b925898a), 2010-01-01
Supplement: b925898a.pdf [file b925898a.pdf]

Supplementary Information (ESI) for Dalton Transactions, 2009/12/10

Supporting Information

For

**Colorimetric Sensing of Cu(II): Cu(II) Induced Deprotonation of an Amide Responsible for Color Changes**

**Contents**

1. **Figure S1.** Fluorescence spectra of **1** (100  $\mu\text{M}$ ) in a methanol-H<sub>2</sub>O solution (v/v = 4/1, 20 mM Hepes buffer, pH 7.0) in the presence of different metal ions (100  $\mu\text{M}$ ).
2. **Figure S2.** Job's plot of **2**-Ni<sup>2+</sup> (top) and **2**-Co<sup>2+</sup> (bottom) complexes, where the absorbance at 483 nm (**2**-Ni<sup>2+</sup>) or the fluorescence at 520 nm (**2**-Co<sup>2+</sup>) was plotted against the mole fraction of Ni<sup>2+</sup> or Co<sup>2+</sup> at a constant total concentration of  $1.0 \times 10^{-4}$  M in a methanol-H<sub>2</sub>O solution (v/v = 4/1, 20 mM Hepes buffer, pH 7.0).
3. **Figure S3.** Absorption spectra of **1** (100  $\mu\text{M}$ ) at different pH values in a methanol-water solution (v/v = 4:1, 20 mM buffer).
4. **Figure S4.** pH titration of Cu(II) binding with chemosensor **2** ( $10^{-4}$  M) in a methanol-H<sub>2</sub>O solution (v/v = 4/1, 20 mM buffer). Both concentrations of Cu(II) was  $10^{-4}$  M.
5. **Figure S5.** pH titration of Ni(II) or Co(II) binding with chemosensor **2** ( $10^{-4}$  M) in a methanol-H<sub>2</sub>O solution (v/v = 4/1, 20 mM buffer).
5. **Figure S6.** IR spectra of **1** and its mixture with Cu(II) in methanol.

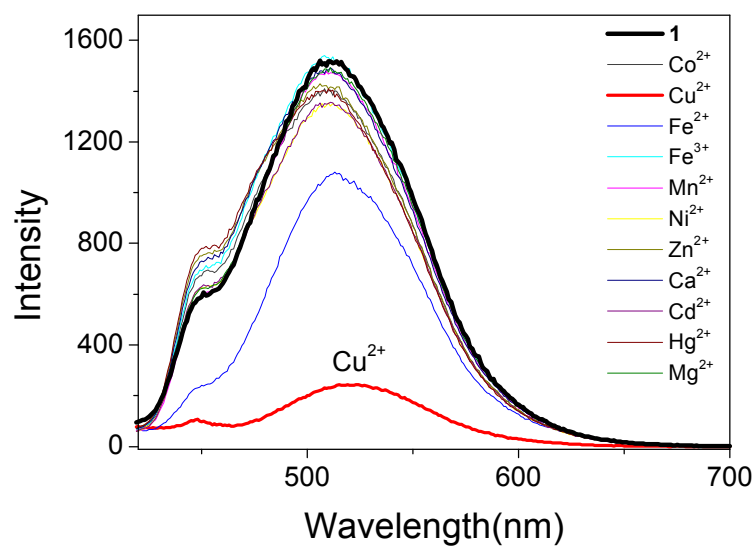

**Figure S1.** Fluorescence spectra of **1** (100 μM) in a methanol-H<sub>2</sub>O solution (v/v = 4/1, 20 mM Hepes buffer, pH 7.0) in the presence of different metal ions (100 μM).

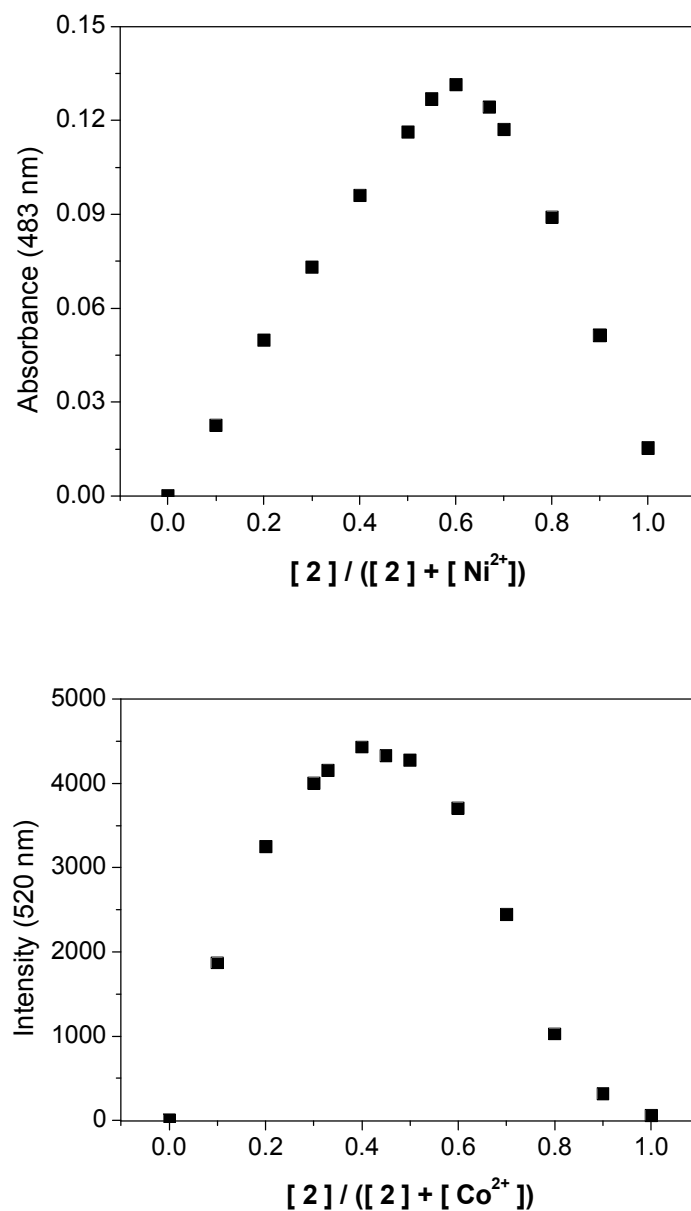

**Figure S2.** Job's plot of **2**-Ni<sup>2+</sup> (top) and **2**-Co<sup>2+</sup> (bottom) complexes, where the absorbance at 483 nm (**2**-Ni<sup>2+</sup>) or the fluorescence at 520 nm (**2**-Co<sup>2+</sup>) was plotted against the mole fraction of Ni<sup>2+</sup> or Co<sup>2+</sup> at a constant total concentration of  $1.0 \times 10^{-4}$  M in a methanol-H<sub>2</sub>O solution (v/v = 4/1, 20 mM Hepes buffer, pH 7.0).

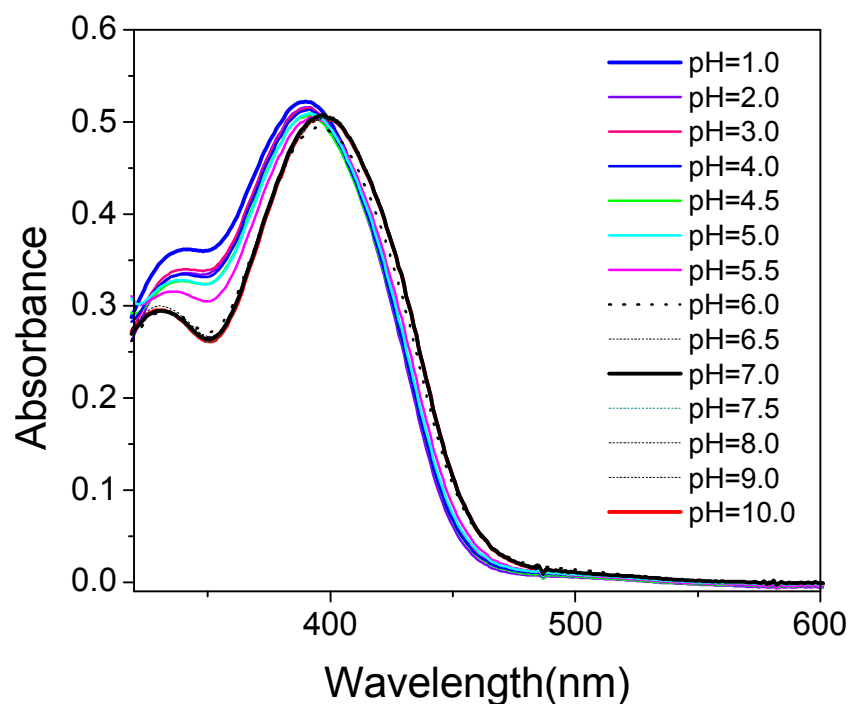

**Figure S3.** Absorption spectra of **1** (100 μM) at different pH values in a methanol-water solution (v/v = 4:1, 20 mM buffer).

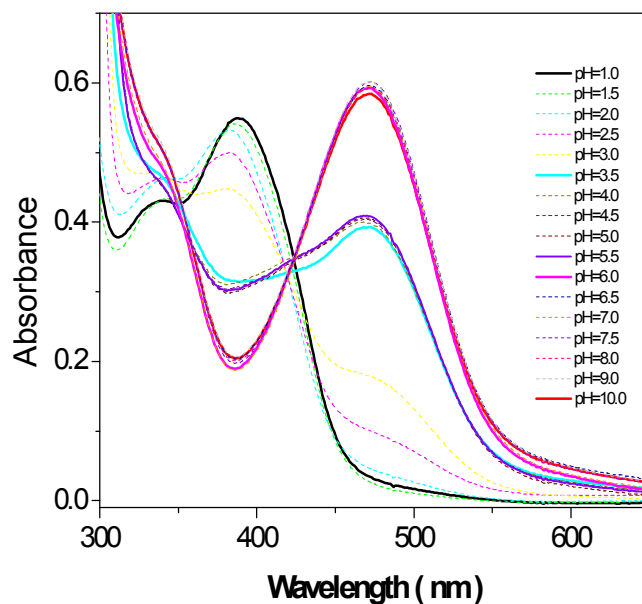

**Figure S4.** pH titration of Cu(II) binding with chemosensor **2** ( $10^{-4}$  M) in a methanol-H<sub>2</sub>O solution (v/v = 4/1, 20 mM buffer). Both concentrations of Cu(II) was  $10^{-4}$  M.

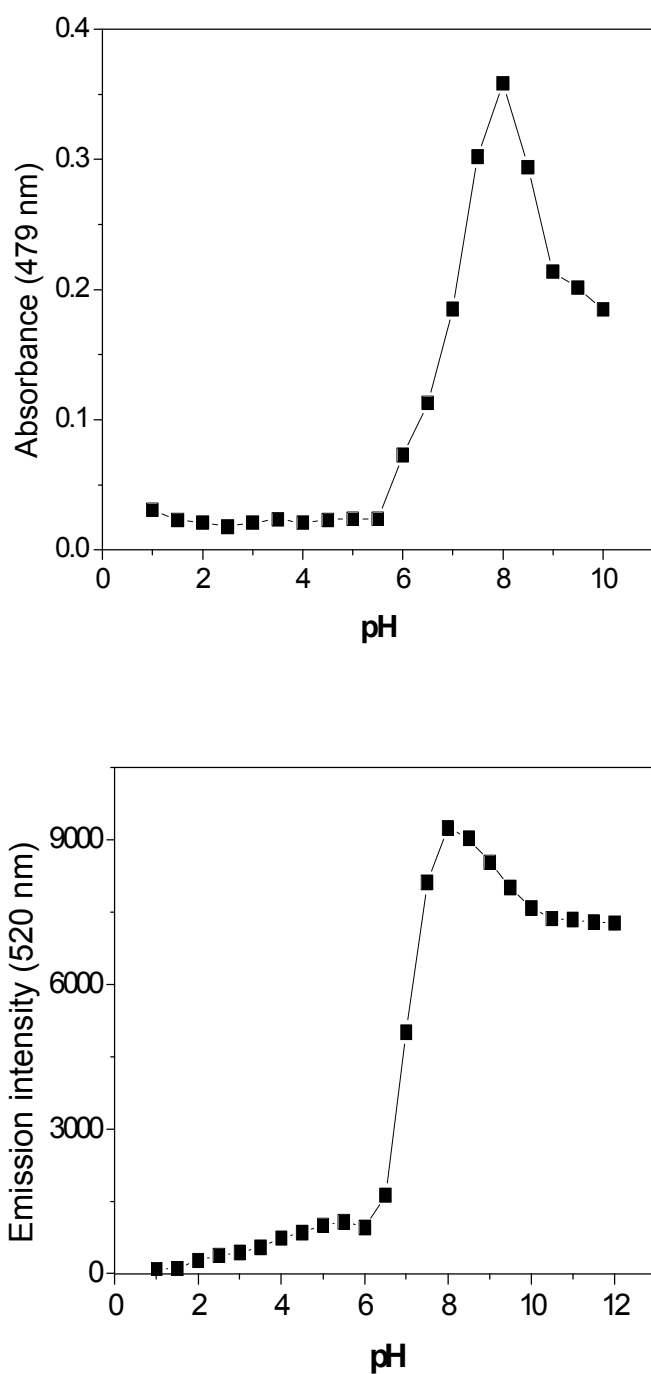

**Figure S5.** pH titration of Ni(II) (top) or Co(II) (bottom) binding with chemosensor **2** ( $10^{-4}$  M) in a methanol- $H_2O$  solution ( $v/v = 4/1$ , 20 mM buffer). Both concentrations of Ni(II) (top) or  $Co^{2+}$  were  $10^{-4}$  M.

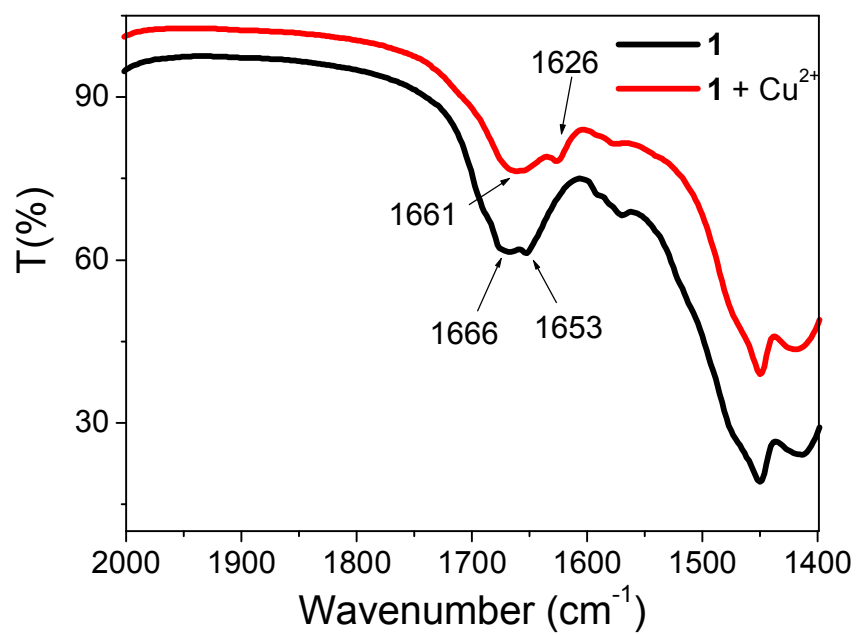

**Figure S6.** IR spectra of **1** and its mixture with Cu(II) in methanol.
